# Supplementary material
Source: HighWire-hosted journal article supplement (https://bmjopenquality.bmj.com/highwire/filestream/135989/field_highwire_adjunct_files/1/ds5845.pdf)
Supplement: ds5845.pdf [file ds5845.pdf]

# Inpatient Post Fall Assessment

|                                                                         |
|-------------------------------------------------------------------------|
| Patient name: .....                                                     |
| NHS no: .....                                                           |
| Hospital no: <i>Please affix patient ID label within this box</i> ..... |
| DOB: .....                                                              |

|                              |  |
|------------------------------|--|
| <b>Fall Date &amp; Time:</b> |  |
|------------------------------|--|

**Description of fall including environmental factors, witnessed? By whom?**

|                     |  |    |  |      |  |                  |  |
|---------------------|--|----|--|------|--|------------------|--|
| <b>Observations</b> |  |    |  |      |  | Time Dr called:  |  |
| BP                  |  | HR |  | SpO2 |  | RR               |  |
|                     |  |    |  |      |  | GCS              |  |
|                     |  |    |  |      |  | Time Dr arrived: |  |

## NURSING ASSESSMENT

|                                                                                                                      |                                                          |                                                         |                                                          |
|----------------------------------------------------------------------------------------------------------------------|----------------------------------------------------------|---------------------------------------------------------|----------------------------------------------------------|
| Assessed the patient for injury:                                                                                     | Yes <input type="checkbox"/> No <input type="checkbox"/> | Documented everything in the patient's notes:           | Yes <input type="checkbox"/> No <input type="checkbox"/> |
| Requested an immediate medical review:                                                                               | Yes <input type="checkbox"/> No <input type="checkbox"/> | Informed the relatives                                  | Yes <input type="checkbox"/> No <input type="checkbox"/> |
| If there is any suspicion of a head injury, commence neurological observations ( <i>until medical review plan</i> ): | Yes <input type="checkbox"/> No <input type="checkbox"/> | Updated the Falls Care Plan:                            | Yes <input type="checkbox"/> No <input type="checkbox"/> |
|                                                                                                                      |                                                          | Ensured other staff on duty are made aware of the fall: | Yes <input type="checkbox"/> No <input type="checkbox"/> |
| Is the patient on anti-coagulants ( <i>inform doctor</i> ):                                                          | Yes <input type="checkbox"/> No <input type="checkbox"/> | Completed an incident report form on Datix              | Yes <input type="checkbox"/> No <input type="checkbox"/> |
| Considered other measures to prevent another fall:                                                                   | Yes <input type="checkbox"/> No <input type="checkbox"/> | <b>Nurse Signature:</b>                                 | <b>Date:</b>                                             |
|                                                                                                                      |                                                          | <b>Print name:</b>                                      | <b>Time:</b>                                             |

## MEDICAL ASSESSMENT

|                             |                                                              |    |                  |    |     |              |
|-----------------------------|--------------------------------------------------------------|----|------------------|----|-----|--------------|
| <b>Observations:</b>        | BP                                                           | HR | SpO2             | RR | GCS | /15 (E V M ) |
| <b>Top-toe examination:</b> | <b>Checked: (sign)</b>                                       |    | <b>Comments:</b> |    |     |              |
| <b>Skull</b>                | Scalp wound/haematoma/ depression/ ridge in skull?           |    |                  |    |     |              |
| <b>Eyes</b>                 | Pupils – equal/reactive?                                     |    |                  |    |     |              |
| <b>Ears</b>                 | Discharge/bleeding?                                          |    |                  |    |     |              |
| <b>Nose</b>                 | Discharge/bleeding?                                          |    |                  |    |     |              |
| <b>Skin</b>                 | Colour/lacerations/ grazes/ bruising?                        |    |                  |    |     |              |
| <b>Mouth</b>                | Tongue bitten/teeth dislodge?                                |    |                  |    |     |              |
| <b>Neck</b>                 | Tenderness?                                                  |    |                  |    |     |              |
| <b>Spine</b>                | Tingling/weakness?                                           |    |                  |    |     |              |
| <b>Chest</b>                | Difficulty in breathing?<br>Tenderness - Collar bones/ ribs? |    |                  |    |     |              |
| <b>Abdomen</b>              | Tenderness?                                                  |    |                  |    |     |              |
| <b>Pelvis</b>               | Tenderness? Haematuria?                                      |    |                  |    |     |              |
| <b>Arms</b>                 | Deformity?                                                   |    |                  |    |     |              |
| <b>Legs</b>                 | Range of movement?                                           |    |                  |    |     |              |

**IMPRESSION**

|                            |  |                                |  |
|----------------------------|--|--------------------------------|--|
| <b>Drug chart changes:</b> |  | <b>Anticoagulation review:</b> |  |
|----------------------------|--|--------------------------------|--|

|                      |                          |              |
|----------------------|--------------------------|--------------|
| <b>Handover Plan</b> | <b>Doctor Signature:</b> | <b>Date:</b> |
|                      | <b>Print name:</b>       | <b>Time:</b> |

|                                               |
|-----------------------------------------------|
| Health Records:<br><i>Where Filed</i><br>UID: |
|-----------------------------------------------|

PLEASE DO NOT WRITE IN THIS BOX
